# Supplementary material for: Activation of fibroblasts by plasma cells via PDGF/PDGFR signaling in IgG4-related sialadenitis
Source: PubMed Central journal article supplement — J Clin Exp Hematop. 2024 Sep 28;64(3):223–31. doi: 10.3960/jslrt.24040 (PMC11528260; doi:10.3960/jslrt.24040), 2024-09-28
Supplement: jslrt-64-223-s001.pdf [file jslrt-64-223-s001.pdf]

Supplementary Material

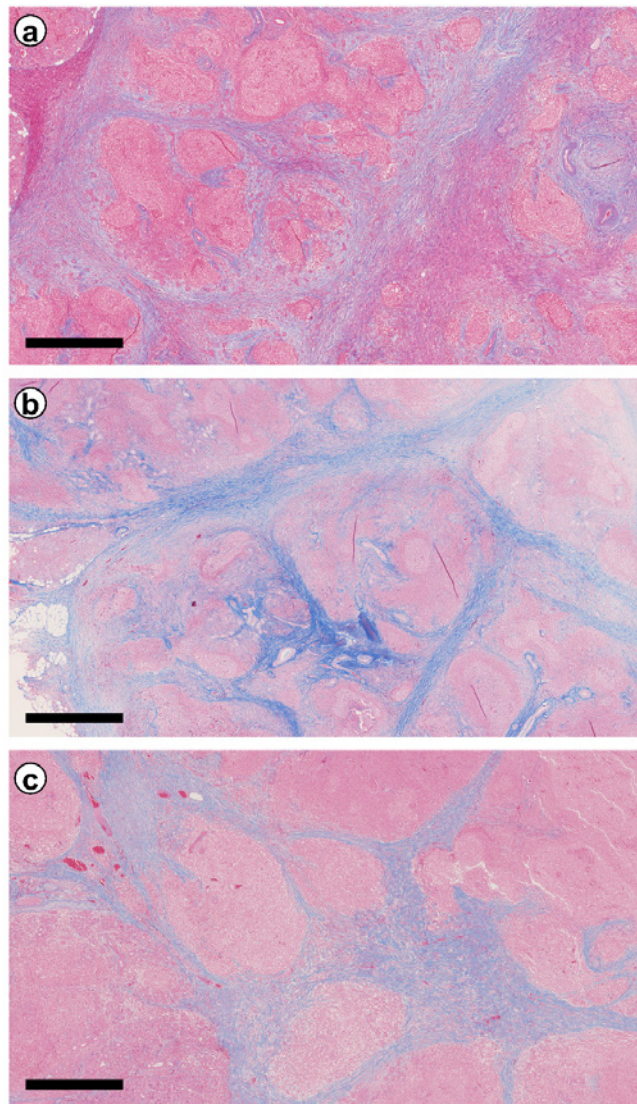

**Supplementary Fig. 1.** Fibrosis in IgG4-SA samples  
*a, b:* Two cases of IgG4-SA group showed severe collagen deposition. *c:* One case showed moderate collagen deposition. Scale bars, 1 mm.

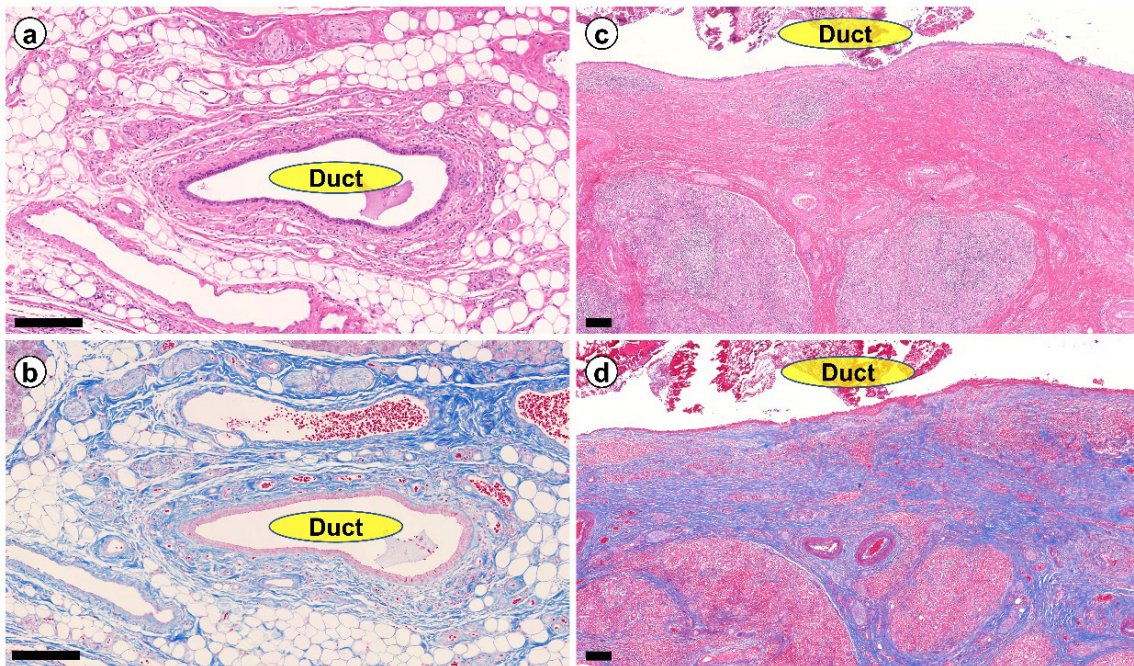

**Supplementary Fig. 2.** Fibrosis was localized around the dilated ducts in chronic-sialadenitis  
*a:* The duct was not dilated in IgG4 sialadenitis (IgG4-SA). *b:* No collagen fiber development was observed around the duct in IgG4-SA. *c:* A part of the dilated duct in chronic sialadenitis (chronic-SA). Salivary stones were observed in the dilated duct. *d:* Collagen fibers developed around the dilated duct in chronic-SA. Scale bars, 200  $\mu\text{m}$ .

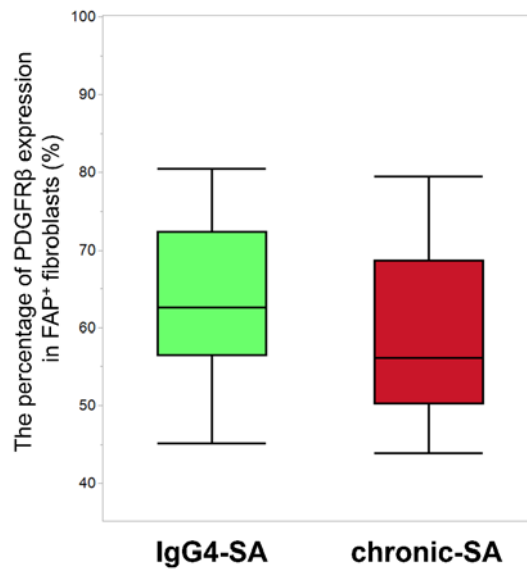

**Supplementary Fig. 3.** The platelet-derived growth factor  $\beta$  receptor expression ratio in FAP $^+$  fibroblasts  
 The platelet-derived growth factor  $\beta$  receptor (PDGFR $\beta$ ) expression rate of FAP-positive cells examined by multiplex immunofluorescence of the IgG4 sialadenitis (IgG4-SA) group was not significantly different from that of the chronic sialadenitis (chronic-SA) group.
